# Supplementary material for: Image-based feedback and analysis system for digital microfluidics
Source: Royal Society of Chemistry journal article supplement (doi:10.1039/c7lc00826k), 2017-01-01
Supplement: c7lc00826k1.zip [file c7lc00826k1.zip]

| SYMBOLS | Item | Description                                                                               | Ref Des                                                                                                                                                                                                | Qty/ board | Symbols on the board                                 | Manufacturer Part Number | Manufacturer                   | BOARDS         |
|---------|------|-------------------------------------------------------------------------------------------|--------------------------------------------------------------------------------------------------------------------------------------------------------------------------------------------------------|------------|------------------------------------------------------|--------------------------|--------------------------------|----------------|
| R       | 1    | 4.7k Ohm ±5% 0.063W, 1/16W Chip Resistor 0402 (1005 Metric) Moisture Resistant Thick Film | R1, R2, R47, R48                                                                                                                                                                                       | 4          | R1,R2,R47,R48                                        | RC0402JR-074K7L          | Yageo                          | CONTROL BOARD  |
| R       | 2    | 39k Ohm ±1% 0.063W, 1/16W Chip Resistor 0402 (1005 Metric) Moisture Resistant Thick Film  | R3, R49                                                                                                                                                                                                | 2          | R3, R49                                              | RC0402FR-0739KL          | Yageo                          | CONTROL BOARD  |
| R       | 3    | 220 Ohm ±5% 0.063W, 1/16W Chip Resistor 0402 (1005 Metric) Moisture Resistant Thick Film  | R17, R18, R19, R20, R21, R22, R23, R24, R25, R26, R27, R28, R29, R30, R31, R32, R33, R34, R35, R36, R63, R64, R65, R66, R67, R68, R69, R70, R71, R72, R73, R74, R75, R76, R77, R78, R79, R80, R81, R82 | 40         | [R17-R36] , [R63-R82]                                | RC0402JR-07220RL         | Yageo                          | CONTROL BOARD  |
| R       | 4    | 1k Ohm ±0.5% 0.063W, 1/16W Chip Resistor 0402 (1005 Metric) Moisture Resistant Thick Film | R4, R5, R6, R7, R8, R9, R10, R11, R12, R13, R37, R38, R39, R40, R41, R42, R43, R44, R45, R46, R50, R51, R52, R53, R54, R55, R56, R57, R58, R59, R83, R84, R85, R86, R87, R88, R89, R90, R91, R92       | 40         | [R4 - R16] , [R37 - R46] , [R50 - R62] , [R83 - R92] | RT0402DRD071KL           | Yageo                          | CONTROL BOARD  |
| C       | 5    | CAP CER 0.1UF 16V X7R 0402                                                                | C1, C2, C3, C4, C5, C6, C7, C8                                                                                                                                                                         | 8          | [C1 - C 8]                                           | CC0402KRX7R7BB104        | Yageo                          | CONTROL BOARD  |
| M       | 6    | I/O Expander 28 I°C 400kHz 28-SSOP                                                        | M1,MX2                                                                                                                                                                                                 | 2          | MAX7300                                              | MAX7300AAI+              | Maxim Integrated               | CONTROL BOARD  |
| I       | 7    | Buffer, Inverting Element 8 Bit per Element Push-Pull Output 20-SOIC                      | I1, I2, I3, I4, I5, I6                                                                                                                                                                                 | 6          | [I1 - I6]                                            | 74AC540SC                | Fairchild/ON Semiconductor     | CONTROL BOARD  |
| U       | 8    | RELAY OPTO 600V 0.04A 8SMD                                                                | U1, U2, U3, U4, U5, U6, U7, U8, U9, U10, U11, U12, U13, U14, U15, U16, U17, U18, U19, U20, U21, U22, U23, U24, U25, U26, U27, U28, U29, U30, U31, U32, U33, U34, U35, U36, U37, U38, U39, U40          | 40         | [U1 - U40]                                           | AQW216EHA                | Panasonic Electric Works       | CONTROL BOARD  |
| AD      | 9    | CONN HEADER 8POS .100" VERT TIN                                                           | AD0, AD0., AD1, AD1.                                                                                                                                                                                   | 3          | AD0 , AD0. , AD1 , AD1.                              | 15912080                 | Molex, LLC                     | CONTROL BOARD  |
| Header  | 10   | STACKING HEADER ARDUINO SHIELD                                                            | HEADER                                                                                                                                                                                                 | 1          | Header                                               | 85                       | Adafruit Industries LLC        | CONTROL BOARD  |
| H1      | 11   | CONN HEADER RT/A 40POS .100 GOLD                                                          | H1                                                                                                                                                                                                     | 1          | H1                                                   | 5499913-9                | TE Connectivity AMP Connectors | CONTROL BOARD  |
|         |      |                                                                                           |                                                                                                                                                                                                        |            |                                                      |                          |                                |                |
| CONX    | 1    | CONN HEADER RT/A 40POS .100 GOLD                                                          | CONX1, CONX2, CONX3                                                                                                                                                                                    | 3          | CONX1 , CONX2 , CONX3                                | 5499913-9                | TE Connectivity AMP Connectors | POGO PIN BOARD |
| N/A     | 2    | CONN PIN SPRING-LOADED PCB GOLD                                                           | US1                                                                                                                                                                                                    | 104        |                                                      | 0906-1:15-20:75-14:11-0  | Mill-Max Manufacturing Corp.   | POGO PIN BOARD |
